# Supplementary material
Source: MDPI journal article supplement (https://www.mdpi.com/1424-8247/14/5/477)
Supplement: s1 [file s1]

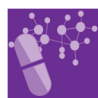

Table S1. Concentrations of MH-76 and prazosin in the liver and adipose tissue of rats at the end of experiment. Values are presented as mean  $\pm$ SD, (n=7-8).

| Compound                                                     | Prazosin                       | MH-76                        |
|--------------------------------------------------------------|--------------------------------|------------------------------|
| Dose administered                                            | 0.2 mg/kg/day i.p. for 6 weeks | 5 mg/kg/day i.p. for 6 weeks |
| Concentration in the liver at the end of experiment          | 301.32 $\pm$ 171.46 ng/g       | 101.07 $\pm$ 36.13 ng/g      |
|                                                              | dose normalized values         |                              |
|                                                              | 1506.6 $\pm$ 857.3 ng/g/dose   | 20.21 $\pm$ 7.22 ng/g/dose   |
| Concentration in the adipose tissue at the end of experiment | 20.83 $\pm$ 15.42 ng/g         | 1372.33 $\pm$ 237.13 ng/g    |
|                                                              | dose normalized values         |                              |
|                                                              | 104.15 $\pm$ 77.1 ng/g/dose    | 274.4 $\pm$ 47.42 ng/g/dose  |

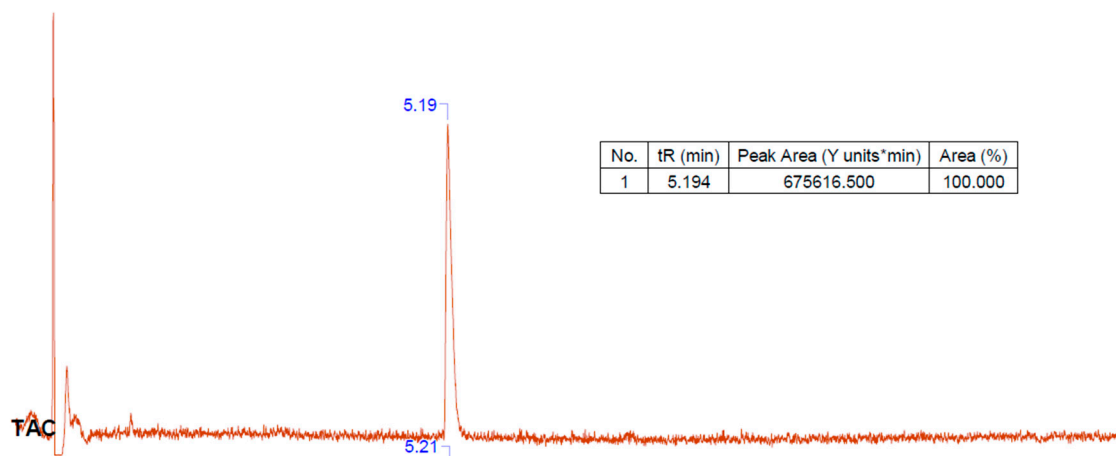

Figure S1. Total absorbance chromatogram (TAC).

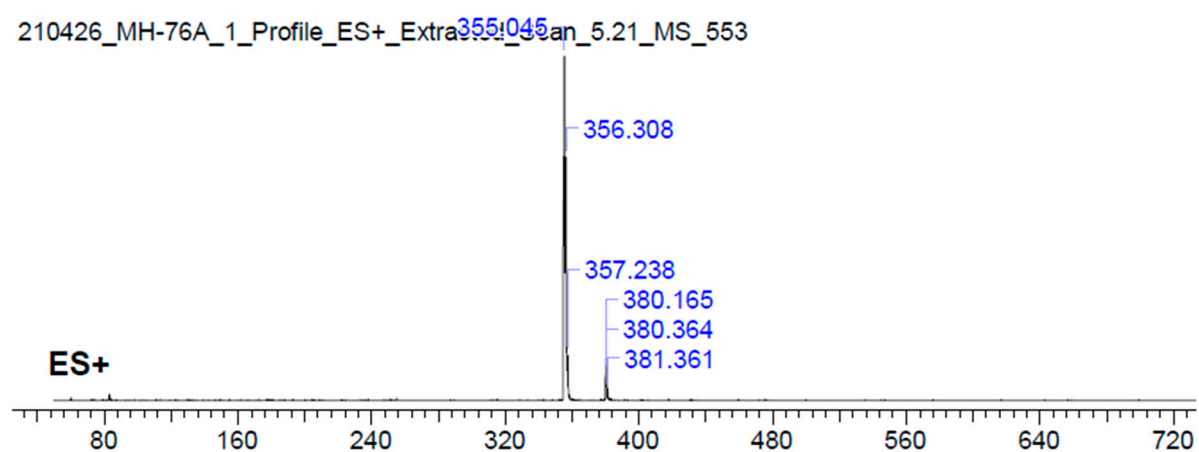

Figure S2. MS detection in full scan mode with positive ionization.
